# Supplementary material for: Economic resilience during COVID-19: the case of food retail businesses in Seattle, Washington
Source: Frontiers journal article supplement (doi:10.3389/fbuil.2023.1212244), 2023-09-28
Supplement: Table_1.docx [file Table_1.docx]

**Supplementary Material Table 1. Data Description**

| **Outcome of Interest** | |
| --- | --- |
| **Open/Closed** | Dummy variable (1 = open), initially collected from the field survey in May/Jun, 2020 and updated from a follow-up survey in Nov/Dec, 2020 |
| **Business General Characteristics** | |
| Business Type | Categorical variable, obtained from the 2018 Seattle Food Permit data and joined with survey data. |
| Price Range | Categorical variable, obtained from Google Knowledge Panel and joined with survey data. |
| Building Type | Categorical variable, obtained by the field survey. |
| Onsite Parking | Dummy variable (1 = with onsite parking), obtained by the field survey. |
| Curbside Parking | Dummy variable (1 = with curb parking), obtained from Seattle GIS portal and joined with survey data |
| **Business-Level Spatial Design Strategies** (Collected in May/Jun, 2020) | |
| Outdoor Built Environment Changes | Five dummy variables (1 = with the corresponding exterior change), obtained from the field survey. |
| Indoor Built Environment Changes | Three dummy variables (1 = with the corresponding interior change), obtained from the field survey. |
| **Neighborhood Density Measurements** | |
| Job Density | Continuous variable, obtained from the geocoded 2018 job point data from the OnTheMap platform (<https://onthemap.ces.census.gov/>) and aggregated to a one-quarter-mile buffer of each business |
| Population Density | Continuous variable, obtained from American Community Survey (2015-2019) |
| Land Use Mixture (Entropy Index) | Continuous variable, calculated from 2016 Seattle Parcel Zoned Development Capacity Model (<https://data.seattle.gov/>) and aggregated to a one-quarter-mile buffer of each business |
|  |
| **Neighborhood Demographic Characteristics** | |  |
| Median Household Income | Continuous variable, obtained from American Community Survey (2015-2019) |  |
| Percentage of Female |  |
| Percentage of Non-Asian People of Color (NAPC) |  |
| Percentage of People 18 to 44 |  |
| **Real Estate Submarket Vacancy** | |  |
| Total Percentage and Square Feet of Vacant Office Space | Continuous variable, quarterly data from 2019 - 2022 at submarket level, obtained from Costar Group Real Estate Database |  |
| Total Percentage and Units of Vacant Multifamily Units |  |
