# Supplementary material for: Economic resilience during COVID-19: the case of food retail businesses in Seattle, Washington
Source: Frontiers journal article supplement (doi:10.3389/fbuil.2023.1212244), 2023-09-28
Supplement: Table_2.docx [file Table_2.docx]

**Supplementary Material Table 1. Comparison between Businesses with and without Signs Posted on Walls or Windows (Phone-Interview, November to December, 2020)**

|  | **No signs posted on walls or windows**  **(N=28)** | **With signs posted on walls or windows**  **(N=54)** | **Overall**  **(N=82)** |
| --- | --- | --- | --- |
| **Received financial relief** | | | |
| Didn’t receive | 9 (32.1%) | 12 (22.2%) | 21 (25.6%) |
| Received | 17 (60.7%) | 40 (74.1%) | 57 (69.5%) |
| Missing | 2 (7.1%) | 2 (3.7%) | 4 (4.9%) |
| **Financial Relief Amount** | | | |
| Mean (SD) | 37500 (35200) | 119000 (141000) | 92900 (123000) |
| Median [Min, Max] | 22400 [3700, 109000] | 87000 [1000, 677000] | 50000 [1000, 677000] |
| Missing | 15 (53.6%) | 26 (48.1%) | 41 (50.0%) |
| **Received rent relief** |  |  |  |
| Didn’t receive | 19 (67.9%) | 32 (59.3%) | 51 (62.2%) |
| Received | 8 (28.6%) | 17 (31.5%) | 25 (30.5%) |
| Missing | 1 (3.6%) | 5 (9.3%) | 6 (7.3%) |
| **May/Jun monthly revenue as a % of pre COVID monthly revenue** | | | |
| Mean (SD) | 0.383 (0.399) | 0.424 (0.336) | 0.410 (0.355) |
| Median [Min, Max] | 0.400 [0, 1.80] | 0.350 [0, 1.27] | 0.350 [0, 1.80] |
| Missing | 7 (25.0%) | 13 (24.1%) | 20 (24.4%) |
| **Nov/Dec monthly revenue as a % of pre COVID monthly revenue** | | | |
| Mean (SD) | 0.565 (0.461) | 0.580 (0.262) | 0.575 (0.332) |
| Median [Min, Max] | 0.393 [0, 2.10] | 0.530 [0.200, 1.35] | 0.500 [0, 2.10] |
| Missing | 8 (28.6%) | 9 (16.7%) | 17 (20.7%) |
| **Online delivery status** | | | |
| No online delivery before or during COVID | 13 (46.4%) | 21 (38.9%) | 34 (41.5%) |
| Started online delivery during COVID | 2 (7.1%) | 11 (20.4%) | 13 (15.9%) |
| Stop online delivery during COVID | 0 (0%) | 1 (1.9%) | 1 (1.2%) |
| Always have online delivery | 11 (39.3%) | 21 (38.9%) | 32 (39.0%) |
| Missing | 2 (7.1%) | 0 (0%) | 2 (2.4%) |
| **May/Jun pickup orders as a % of total orders** | | | |
| Mean (SD) | 0.573 (0.412) | 0.612 (0.392) | 0.599 (0.396) |
| Median [Min, Max] | 0.550 [0, 1.00] | 0.750 [0, 1.00] | 0.700 [0, 1.00] |
| Missing | 4 (14.3%) | 6 (11.1%) | 10 (12.2%) |
| **Nov/Dec pickup orders as a % of total orders** | | | |
| Mean (SD) | 0.736 (0.351) | 0.708 (0.291) | 0.718 (0.311) |
| Median [Min, Max] | 1.00 [0, 1.00] | 0.800 [0, 1.00] | 0.850 [0, 1.00] |
| Missing | 2 (7.1%) | 5 (9.3%) | 7 (8.5%) |
| **May/Jun typical operation hours per day** | | | |
| Mean (SD) | 5.83 (4.66) | 7.15 (3.61) | 6.69 (4.03) |
| Median [Min, Max] | 6.00 [0, 12.5] | 8.00 [0, 13.0] | 7.80 [0, 13.0] |
| Missing | 1 (3.6%) | 3 (5.6%) | 4 (4.9%) |
| **Nov/Dec typical operation hours per day** | | | |
| Mean (SD) | 8.28 (3.24) | 8.22 (2.66) | 8.24 (2.85) |
| Median [Min, Max] | 8.00 [0, 14.0] | 9.00 [0, 12.0] | 8.68 [0, 14.0] |
| Missing | 1 (3.6%) | 1 (1.9%) | 2 (2.4%) |
| **Phase1 employees full time** | | | |
| Mean (SD) | 2.46 (2.89) | 3.16 (4.44) | 2.93 (3.99) |
| Median [Min, Max] | 1.00 [0, 9.00] | 2.00 [0, 20.0] | 2.00 [0, 20.0] |
| Missing | 2 (7.1%) | 2 (3.7%) | 4 (4.9%) |
| **Phase2 employees full time** | | | |
| Mean (SD) | 3.37 (3.53) | 5.58 (6.69) | 4.82 (5.88) |
| Median [Min, Max] | 2.00 [0, 12.0] | 4.00 [0, 40.0] | 2.00 [0, 40.0] |
| Missing | 1 (3.6%) | 2 (3.7%) | 3 (3.7%) |
| **May/Jun full time employees as percentage of before COVID** | | | |
| Mean (SD) | 0.625 (0.484) | 0.429 (0.371) | 0.493 (0.419) |
| Median [Min, Max] | 0.833 [0, 1.50] | 0.333 [0, 1.00] | 0.429 [0, 1.50] |
| Missing | 4 (14.3%) | 5 (9.3%) | 9 (11.0%) |
| **Nov/Dec full time employees as percentage of before COVID** | | | |
| Mean (SD) | 0.709 (0.420) | 0.620 (0.317) | 0.649 (0.354) |
| Median [Min, Max] | 1.00 [0, 1.50] | 0.667 [0, 1.00] | 0.667 [0, 1.50] |
| Missing | 4 (14.3%) | 5 (9.3%) | 9 (11.0%) |
